# Supplementary material for: High-throughput discovery of umami peptides from pork bone and elucidation of their molecular mechanism for umami taste perception
Source: Royal Society of Chemistry journal article supplement (doi:10.1039/d4fo03145h), 2024-01-01
Supplement: d4fo03145h1.pdf [file d4fo03145h1.pdf]

**Table S1.** Enzymes for *in silico* proteolysis recorded in the BIOPEP-UWM tool.

| No. | Enzyme                                | No. | Enzyme                                           |
|-----|---------------------------------------|-----|--------------------------------------------------|
| 11  | chymotrypsin                          | 28  | thrombin                                         |
| 12  | trypsin                               | 29  | pancreatic elastase II                           |
| 13  | pepsin (pH 1.3)                       | 30  | stem bromelain                                   |
| 14  | Proteinase K                          | 31  | glutamyl endopeptidase II                        |
| 15  | pancreatic elastase                   | 32  | oligopeptidase B                                 |
| 16  | prolyl oligopeptidase                 | 33  | calpain 2                                        |
| 17  | V-8 protease (Glutamyl endopeptidase) | 34  | glycyl endopeptidase                             |
| 18  | thermolysin                           | 36  | oligopeptidase F                                 |
| 19  | chymotrypsin                          | 37  | proteinase P1 (lactocepin)                       |
| 20  | plasmin                               | 38  | Xaa-Pro dipeptidase                              |
| 21  | cathepsin G                           | 39  | pepsin (pH > 2)                                  |
| 22  | clostripain                           | 40  | coccolysin                                       |
| 23  | chymase                               | 41  | subtilisin                                       |
| 24  | papain                                | 42  | chymosin                                         |
| 25  | ficin                                 | 43  | ginger protease (zingipain)                      |
| 26  | leukocyte elastase                    | 44  | V-8 protease (Glutamyl endopeptidase) (pH = 7.8) |
| 27  | metridin                              |     |                                                  |

**Table S2.** Overview of computational tools utilized in this study.

| Category | Name                    | Website (version)                                                                                                                                                                                                                                                           | Description                                                                                                         |
|----------|-------------------------|-----------------------------------------------------------------------------------------------------------------------------------------------------------------------------------------------------------------------------------------------------------------------------|---------------------------------------------------------------------------------------------------------------------|
| Software | Modeller                | <a href="https://salilab.org/modeller/">https://salilab.org/modeller/</a> (v10.1)                                                                                                                                                                                           | Program for homology or comparative modeling of protein three-dimensional structures                                |
|          | Amber                   | <a href="https://ambermd.org/">https://ambermd.org/</a> (v16)                                                                                                                                                                                                               | Program for biomolecular simulation                                                                                 |
|          | Pymol                   | <a href="https://pymol.org/2/">https://pymol.org/2/</a> (v2.0)                                                                                                                                                                                                              | Molecular visualization system                                                                                      |
|          | Auto Dock Vina          | <a href="https://vina.scripps.edu/">https://vina.scripps.edu/</a> (v1.5.6)                                                                                                                                                                                                  | An open-source program for doing molecular docking                                                                  |
|          | BIOVIA Discovery Studio | <a href="https://www.3ds.com/products-services/biovia/products/molecular-modeling-simulation/biovia-discovery-studio/visualization/">https://www.3ds.com/products-services/biovia/products/molecular-modeling-simulation/biovia-discovery-studio/visualization/</a> (v2016) | A molecular modeling application for viewing (visualization), sharing and analyzing protein and small molecule data |
| Database | UniProt                 | <a href="http://www.uniprot.org/">http://www.uniprot.org/</a>                                                                                                                                                                                                               | Protein sequence and functional information                                                                         |
|          | BIOPEP-UWM              | <a href="https://biochemia.uwm.edu.pl/biopep-uwm/">https://biochemia.uwm.edu.pl/biopep-uwm/</a>                                                                                                                                                                             | Bioactive peptide database, in silico hydrolysis program                                                            |
|          | PeptideRanker           | <a href="http://distilldeep.ucd.ie/PeptideRanker/">http://distilldeep.ucd.ie/PeptideRanker/</a>                                                                                                                                                                             | Evaluation of probability that the peptide will be bioactive                                                        |
|          | ToxinPred               | <a href="http://crdd.osdd.net/raghava/toxinpred/index.html">http://crdd.osdd.net/raghava/toxinpred/index.html</a>                                                                                                                                                           | Toxicity prediction of peptides and design of toxic/non-toxic peptides                                              |
|          | AllerTOP                | <a href="https://www.ddg-pharmfac.net/AllerTOP/">https://www.ddg-pharmfac.net/AllerTOP/</a>                                                                                                                                                                                 | Allergenicity prediction of peptides                                                                                |
|          | Innovagen               | <a href="http://www.innovagen.com/proteomics-tools">http://www.innovagen.com/proteomics-tools</a>                                                                                                                                                                           | Peptide physiochemical property (Mw, PI, solubility...) calculator                                                  |
|          | Expasy-protparam        | <a href="https://web.expasy.org/protparam/">https://web.expasy.org/protparam/</a>                                                                                                                                                                                           | Peptide physiochemical property (Mw, PI, stability...) calculator                                                   |
|          | UMPred-FRL              | <a href="http://pmlabstack.pythonanywhere.com/UMPred-FRL">http://pmlabstack.pythonanywhere.com/UMPred-FRL</a>                                                                                                                                                               | Screening of candidate peptides with potential umami sensory properties                                             |
|          | Umami_YYDS              | <a href="http://tastepeptides-meta.com/Umami_YYDS">http://tastepeptides-meta.com/Umami_YYDS</a>                                                                                                                                                                             | Umami/bitterness judgment model based on machine learning and chemical descriptors                                  |
|          | Umami-MRNN              | <a href="https://umami-mrnn.herokuapp.com/">https://umami-mrnn.herokuapp.com/</a>                                                                                                                                                                                           | Deep learning-based method to predict umami peptides                                                                |
|          | RCSB PDB                | <a href="https://www.rcsb.org/">https://www.rcsb.org/</a>                                                                                                                                                                                                                   | Global protein data bank archive of 3D structure data for large biological molecules                                |
|          | SAVES                   | <a href="https://saves.mbi.ucla.edu/">https://saves.mbi.ucla.edu/</a>                                                                                                                                                                                                       | Structure validation server                                                                                         |

**Table S3.** List of umami peptides reported by August 2023.

| Peptide sequence | Length | Taste attributes      | Source                                           | Reference (doi)                    |
|------------------|--------|-----------------------|--------------------------------------------------|------------------------------------|
| AD               | 2      | Umami                 | Synthesized, Chicken enzymatic hydrolysate (CEH) | 10.1016/j.biomaterials.2021.121338 |
| AE               | 2      | Umami                 | Synthesized, CEH                                 |                                    |
| AF               | 2      | Umami                 | Chicken soup                                     |                                    |
| AH               | 2      | Umami                 | CEH                                              |                                    |
| AM               | 2      | Umami                 | CEH                                              |                                    |
| CE               | 2      | Umami/Sour            | MRP of Bovine bone marrow extract                |                                    |
| CM               | 2      | Umami                 | Shiitake mushroom                                |                                    |
| DA               | 2      | Umami                 | Soy sauce                                        |                                    |
| DD               | 2      | Umami                 | Beef Soup                                        |                                    |
| DE               | 2      | Umami                 | Beef Soup                                        |                                    |
| DL               | 2      | Umami                 | Synthesized                                      |                                    |
| DR               | 2      | Umami                 | Soy sauce                                        |                                    |
| EA               | 2      | Umami                 | Heated yeast extract (YE)                        |                                    |
| ED               | 2      | MSG-like, brothy      | Fish protein hydrolysate (FPH), Heated YE, CEH   |                                    |
| EE               | 2      | Umami/brothy/MSG-like | Beef soup, FPH                                   |                                    |
| EK               | 2      | Umami                 | Beef soup                                        |                                    |
| EL               | 2      | Umami                 | Synthesized, heated YE                           |                                    |
| EN               | 2      | Umami                 | Heated YE                                        |                                    |
| EP               | 2      | Umami/Astringent      | MRP of peanut hydrolysate (PH)                   |                                    |
| ES               | 2      | Umami                 | Heated YE, PMSP, FPH                             |                                    |
| ET               | 2      | Umami                 | PMSP                                             |                                    |
| EV               | 2      | Umami/Sweet           | CEH                                              |                                    |
| GD               | 2      | Umami                 | Synthesized                                      |                                    |
| GE               | 2      | Umami                 | Synthesized, Spain hams, shiitake mushroom       |                                    |
| HS               | 2      | Umami                 | CEH                                              |                                    |
| HV               | 2      | Umami                 | Heated YE                                        |                                    |
| KG               | 2      | Umami                 | Heated YE                                        |                                    |
| LE               | 2      | Umami                 | Synthesized                                      |                                    |
| LV               | 2      | Umami                 | Heated YE                                        |                                    |
| NY               | 2      | Umami                 | Heated YE                                        |                                    |
| QL               | 2      | Umami                 | Heated YE                                        |                                    |
| RL               | 2      | Umami                 | Synthesized                                      |                                    |
| TE               | 2      | MSG-like, Umami       | FPH, chicken soup                                |                                    |
| VD               | 2      | Umami                 | Synthesized                                      |                                    |

---

|     |   |                   |                                 |
|-----|---|-------------------|---------------------------------|
| VE  | 2 | Umami             | Synthesized, CEH                |
| VT  | 2 | Umami             | Chicken soup                    |
| VV  | 2 | Umami             | Heated YE, synthesized          |
| ADA | 3 | Umami             | Synthesized, heated YE          |
| AEA | 3 | Umami             | Synthesized, heated YE, CEH     |
| APA | 3 | Umami             | Heated YE                       |
| DAE | 3 | Umami             | Soy sauce                       |
| DAG | 3 | Umami             | CEH                             |
| DCG | 3 | Umami             | Wheat gluten fermentation broth |
| DDD | 3 | Umami             | Synthesized                     |
| DDE | 3 | Umami             | Synthesized                     |
| DED | 3 | Umami             | Synthesized                     |
| DEE | 3 | Umami             | Synthesized                     |
| DEL | 3 | Umami             | Synthesized                     |
| DES | 3 | MSG-like          | FPH                             |
| DQR | 3 | Umami/Sour        | PH                              |
| EDD | 3 | Umami             | Synthesized                     |
| EDE | 3 | MSG-like          | FPH                             |
| EDG | 3 | Umami/Sour        | PH                              |
| EED | 3 | Umami             | Synthesized                     |
| EEE | 3 | Umami/Salty       | Synthesized, wine               |
| EEL | 3 | Umami             | Synthesized                     |
| EGF | 3 | Umami/Kokumi      | PH                              |
| EGS | 3 | Brothy/MSG-like   | PMSP, FPH                       |
| EMH | 3 | Umami             | Heated YE                       |
| EPE | 3 | Umami             | Shiitake mushroom               |
| EPQ | 3 | MSG-like          | Deamidated wheat gluten         |
| EQE | 3 | MSG-like          | FPH                             |
| ESV | 3 | Umami             | Synthesized                     |
| EVC | 3 | Umami             | Soy sauce                       |
| GCG | 3 | Umami             | Shiitake mushroom               |
| GDG | 3 | Umami             | Synthesized                     |
| GEG | 3 | Umami             | Synthesized                     |
| GFP | 3 | Umami (enhancing) | SPH                             |
| GGY | 3 | Umami             | Heated YE                       |
| GLE | 3 | Umami             | Soy sauce                       |
| LVG | 3 | Umami             | Heated YE                       |
| NNP | 3 | Umami/Sweet       | PH                              |
| PAA | 3 | Umami             | Heated YE                       |
| PET | 3 | Umami             | Heated YE                       |

---

---

|        |   |                        |                      |
|--------|---|------------------------|----------------------|
| PGD    | 3 | Umami                  | Heated YE            |
| PSE    | 3 | Umami                  | Manchego Cheese      |
| PSG    | 3 | Umami                  | Heated YE            |
| QPS    | 3 | Umami                  | Heated YE            |
| RKE    | 3 | Umami                  | Manchego Cheese      |
| SEE    | 3 | MSG-like               | FPH                  |
| SFE    | 3 | Umami/Astringent       | MRP of PH            |
| TAY    | 3 | Umami (enhancing)      | SPH                  |
| TGC    | 3 | Umami                  | Soy sauce            |
| VAV    | 3 | Umami                  | Heated YE            |
| VDV    | 3 | Umami                  | Synthesized          |
| VEH    | 3 | Umami                  | Heated YE            |
| VEV    | 3 | Umami                  | Synthesized          |
| VGG    | 3 | Umami                  | Synthesized          |
| VPY    | 3 | Umami (enhancing)      | SPH                  |
| AAPY   | 4 | Umami (enhancing)      | SPH                  |
| GGGE   | 4 | Umami                  | Soy sauce            |
| GGPG   | 4 | Umami                  | Heated YE            |
| INEL   | 4 | Umami                  | Manchego Cheese      |
| LEQL   | 4 | Umami                  | Manchego Cheese      |
| LYER   | 4 | Kokumi/Sweetness/Umami | TOH                  |
| NRTF   | 4 | Umami                  | Synthesized          |
| QEEL   | 4 | Umami                  | Manchego Cheese      |
| VRSY   | 4 | Kokumi/Sweetness/Umami | TOH                  |
| VEAL   | 4 | Umami                  | Soy sauce            |
| AFDEK  | 5 | Umami (enhancing)      | Douchi               |
| CALTP  | 5 | Umami/Kokumi           | T. obscurus (100 °C) |
| EAGIQ  | 5 | Umami                  | Soy sauce            |
| EEDGK  | 5 | Umami                  | Synthesized          |
| EQEEL  | 5 | Umami                  | Manchego Cheese      |
| EQQQQ  | 5 | Umami/Salty            | Soy sauce            |
| HCHTN  | 5 | Umami                  | Synthesized          |
| LPEEV  | 5 | Umami/Sweet            | Soy sauce            |
| NGKET  | 5 | Umami                  | PHH                  |
| SAEQK  | 5 | Umami                  | Manchego Cheese      |
| VVGET  | 5 | Umami                  | Manchego Cheese      |
| ALPEEV | 6 | Umami                  | Soy sauce            |
| CCNKS  | 6 | Umami                  | Jinhua ham           |
| DFKREP | 6 | Umami                  | White Sufu           |
| EFKEYN | 6 | Umami/Kokumi           | T. rubripes (4 °C)   |

---

---

|           |   |                     |                      |
|-----------|---|---------------------|----------------------|
| EHAMLN    | 6 | Umami/Kokumi        | T. rubripes (4 °C)   |
| ENINEL    | 6 | Umami               | Manchego Cheese      |
| GPDPER    | 6 | Umami               | Atlantic cod         |
| INKPGL    | 6 | Umami               | Atlantic cod         |
| KGRYER    | 6 | Kokumi/Sweet/Umami  | TOH                  |
| LAPSTM    | 6 | Umami               | Beef stir-fried      |
| LSERYP    | 6 | Umami               | PHH                  |
| NVVGET    | 6 | Umami               | Manchego Cheese      |
| PDLPNT    | 6 | Umami               | PHH                  |
| RPLGNC    | 6 | Umami/Kokumi        | T.obscurus (100 °C)) |
| SDSCIR    | 6 | Umami               | Atlantic cod         |
| TESSSE    | 6 | Umami/Kokumi        | PH                   |
| TLRRCM    | 6 | Umami/Kokumi        | T. obscurus (4 °C)   |
| AHSVRFY   | 7 | Umami               | Parma ham            |
| ASNMSDL   | 7 | Umami (enhancing)   | Volvariella volvacea |
| DREKFDE   | 7 | Umami               | White Sufu           |
| HLQLAIR   | 7 | Umami/Kokumi/Sour   | T.rubripes (100 °C)  |
| LQPLNAH   | 7 | Umami (enhancing)   | Volvariella volvacea |
| PGGVRNG   | 7 | Umami/Kokumi/Bitter | T. rubripes (4 °C)   |
| PVARMCR   | 7 | Umami/Kokumi        | T. obscurus (4 °C)   |
| AQALQAQA  | 8 | Umami/Sweet         | Soy sauce            |
| DEDFKREP  | 8 | Umami/Sour          | White Sufu           |
| DPLRGGYY  | 8 | Umami/Kokumi/       | T. rubripes (100 °C) |
| ESDVVSDL  | 8 | Umami               | BRH                  |
| FADNVFAL  | 8 | Umami               | Beef stir-fried      |
| FAGDDAPR  | 8 | Umami               | Beef stir-fried      |
| GSGVGGAK  | 8 | Umami               | BRH                  |
| KGDEESLA  | 8 | Delicious taste     | Beef brothy          |
| KGSLADEE  | 8 | Umami               | Synthesized          |
| PECGLVVG  | 8 | Umami               | Beef stir-fried      |
| RPNPFENR  | 8 | Umami               | Clam                 |
| SLADEEKG  | 8 | Umami               | Synthesized          |
| SLAKGDEE  | 8 | Umami               | Synthesized          |
| SSRNEQSR  | 8 | Umami               | PH                   |
| VAPEEHPT  | 8 | Umami               | Beef stir-fried      |
| YGGTPPFV  | 8 | Umami/Sweet         | T. obscurus (100 °C) |
| AGLQFPVGR | 9 | Umami/Kokumi/Bitter | T. rubripes (100 °C) |
| DVILPVPAF | 9 | Umami               | T. flavidus          |
| DVNNPANQL | 9 | Umami               | SSH                  |

---

|                   |    |                             |                                     |                         |
|-------------------|----|-----------------------------|-------------------------------------|-------------------------|
| EFEGGSIEH         | 9  | Umami                       | SSH                                 |                         |
| GLLPDGTTPR        | 9  | Umami                       | Clam                                |                         |
| LLLPGELAK         | 9  | Umami/Sweet                 | T. rubripes (100 °C)                |                         |
| SSVGGGSAG         | 9  | Umami                       | BRH                                 |                         |
| STMLESER          | 9  | Umami                       | Clam                                |                         |
| YKCKDGDRL         | 9  | Kokumi/Umami                | T. obscurus hydrolysate             |                         |
| AGFAGDDAPR        | 10 | Umami/Sweet/Kokumi          | T. rubripes (100 °C)                |                         |
| ANPGPVRDLR        | 10 | Umami                       | Clam                                |                         |
| DVNNPANQLD        | 10 |                             | Sunflower seed                      |                         |
| GYSFTTTAER        | 10 | Umami/Sweet                 | T. rubripes (100 °C)                |                         |
| IGAEVYHNLK        | 10 | Weak umami                  | T. flavidus                         |                         |
| QVAIAHRDAK        | 10 | Umami                       | Clam                                |                         |
| AGGGGGGVVAG       | 11 | Umami                       | BRH                                 |                         |
| AMLEQVAMTDK       | 11 | Umami                       | T. flavidus                         |                         |
| EGSEAPDGSSR       | 11 | Umami                       | PH                                  |                         |
| NNENQLDEYQR       | 11 | Umami                       | SSH                                 |                         |
| VLPTDQNFILR       | 11 | Umami                       | Clam                                |                         |
| DAGVIAGLNVL       | 12 | Umami/Sweet/Kokumi          | T. rubripes (100 °C)                |                         |
| GGKLVVDGHAIT      | 12 | Umami                       | T. flavidus                         |                         |
| VTADESQQDVLK      | 12 | Umami                       | Clam                                |                         |
| RGENSEEEGAIVT     | 14 | Umami/Kokumi                | PH                                  |                         |
| RGENSEDEQGAIVT    | 14 | Umami/Astringent            | MRP of PH                           |                         |
| GENEEEDSGAIVTVK   | 15 | Umami                       | Tempeh                              |                         |
| TVAGGAWTYNTTSAVTV | 18 | Umami/Sweet                 | T. flavidus                         |                         |
| K                 |    |                             |                                     |                         |
| EINEL             | 5  | Umami                       | Manchego cheese                     | BIOPEP-UWM database     |
| VG                | 2  | Umami                       | Synthesized                         |                         |
| DG                | 2  | Umami                       | Fish protein hydrolysate            |                         |
| EG                | 2  | Umami                       | Fish protein hydrolysate            |                         |
| EDF               | 3  | Umami                       | Jinhua and Parma hams               |                         |
| EDV               | 3  | Umami                       | Jinhua and Parma hams               |                         |
| EY                | 2  | Umami                       | Synthesized                         |                         |
| PE                | 2  | Umami enhancing             | Jinhua and Parma hams               |                         |
| PAQ               | 3  | Umami enhancing             | Jinhua and Parma hams               |                         |
| DGG               | 3  | Umami enhancing             | Jinhua and Parma hams               |                         |
| IPIPATKT          | 8  | Umami                       | Sanhuang chicken hydrolysate        |                         |
| NP                | 2  | Umami                       | Synthesized                         |                         |
| LEE               | 3  | Umami                       | Synthesized                         | 10.1111/1750-3841.13576 |
| EPS               | 3  | MSG-like                    | Deamidated wheat gluten hydrolysate |                         |
| ESLA              | 4  | Sour > astringent > umami > | Synthesized                         |                         |

---

|            |    |                                                    |                               |                         |
|------------|----|----------------------------------------------------|-------------------------------|-------------------------|
| EESLA      | 5  | bitter<br>Sour > astringent > umami ><br>bitter    | Synthesized                   |                         |
| DEESLA     | 6  | Sour > astringent > umami ><br>sweet > bitter      | Synthesized                   |                         |
| WVNEEDHL   | 8  | Sour, astringent, weak sweet                       | Chicken                       | 10.1111/1541-4337.12916 |
| NSLEGEFKG  | 9  | Sour, astringent, thickness                        | Chicken                       |                         |
| KDLFDPVIQD | 10 | Weak sour and astringent                           | Chicken                       |                         |
| ADGLWL     | 6  | Astringent, umami, sweet, sour,<br>bitter          | Sanhuang chicken hydrolysates |                         |
| GFLGPQ     | 6  | Astringent, sour, umami, sweet,<br>bitter          | Sanhuang chicken hydrolysates |                         |
| AGDDAPR    | 7  | Sour, umami                                        | Sanhuang chicken hydrolysates |                         |
| IGPGLGR    | 7  | Sour, umami                                        | Sanhuang chicken hydrolysates |                         |
| KDGGGGK    | 7  | Umami                                              | Sanhuang chicken hydrolysates |                         |
| SEASNNK    | 7  | Sweet, umami                                       | Sanhuang chicken hydrolysates |                         |
| HGEDKEGE   | 8  | Sour, umami                                        | Sanhuang chicken hydrolysates |                         |
| PGPAGPAGP  | 9  | Astringent, umami                                  | Sanhuang chicken hydrolysates |                         |
| GS         | 2  |                                                    | Porcine bone protein extracts |                         |
| KP         | 2  |                                                    | Porcine bone protein extracts |                         |
| PN         | 2  |                                                    | Porcine bone protein extracts |                         |
| SY         | 2  |                                                    | Porcine bone protein extracts |                         |
| APHR       | 4  |                                                    | Porcine bone protein extracts |                         |
| PDKPNT     | 6  |                                                    | Jinhua ham                    |                         |
| ER         | 2  |                                                    | Crab sauce                    |                         |
| WF         | 2  |                                                    | Crab sauce                    |                         |
| DPC        | 3  |                                                    | Crab sauce                    |                         |
| DVC        | 3  |                                                    | Crab sauce                    |                         |
| DVD        | 3  |                                                    | Crab sauce                    |                         |
| DK         | 2  | Umami                                              | Myosin                        |                         |
| EEK        | 3  | Umami                                              | Myosin                        |                         |
| EDQK       | 4  | Umami                                              | Myosin                        |                         |
| SEGGR      | 5  | Umami                                              | Myosin                        |                         |
| QDSIGS     | 6  | Umami                                              | Myosin                        |                         |
| DAPYDYK    | 7  | Outstanding umami, sourness<br>and sweet           | Chinese anchovy sauce         |                         |
| NQEGLFR    | 7  | Umami and bitterness, slightly<br>sourness         | Chinese anchovy sauce         |                         |
| VYETPDR    | 7  | Moderate umami, slightly<br>sourness or bitterness | Chinese anchovy sauce         |                         |

---



|                  |    |                                                   |                         |
|------------------|----|---------------------------------------------------|-------------------------|
| EGSTIGLSK        | 9  | Umami, slightly bitterness and sourness           | Chinese anchovy sauce   |
| MAASGDVGK        | 9  | Moderate umami and sourness, distinct sweet       | Chinese anchovy sauce   |
| TREQMIHER        | 9  | Umami, slightly sourness and bitterness           | Chinese anchovy sauce   |
| EATLWDMEEK       | 10 | Outstanding umami and bitterness                  | Chinese anchovy sauce   |
| LLDAFFFDNK       | 10 | Moderate umami and sweet, slightly sourness       | Chinese anchovy sauce   |
| LPLLEEAFLSR      | 11 | Umami, bitterness                                 | Chinese anchovy sauce   |
| MEREQEESTMR      | 11 | Apparent umami                                    | Chinese anchovy sauce   |
| AKLTSLEECQR      | 12 | Outstanding umami, slightly sourness and sweet    | Chinese anchovy sauce   |
| NALKSVECYDAR     | 12 | Outstanding umami and sweet                       | Chinese anchovy sauce   |
| YLASCLSSVKEEK    | 13 | Outstanding umami and sweet                       | Chinese anchovy sauce   |
| EQLEATVQKLDERS   | 14 | Moderate umami, slightly sweet and bitterness     | Chinese anchovy sauce   |
| IMEALAGAGIDPRR   | 14 | Umami, slightly bitterness and sourness           | Chinese anchovy sauce   |
| SGVVAAVNDAAKDFHG | 16 | Apparent sweet, moderate umami, slightly sourness | Chinese anchovy sauce   |
| VLSLNSGTEAVEAAIK | 16 | Moderate sweet, slightly umami and sourness       | Chinese anchovy sauce   |
| APAP             | 4  | Sour, salty                                       | Trachinotus ovatus      |
| ASEFFR           | 6  | Sweet, sour, bitter                               | Trachinotus ovatus      |
| WDDMEK           | 6  | Umami, sour, salty, kokumi                        | Trachinotus ovatus      |
| AEASALR          | 7  | Umami, sour                                       | Trachinotus ovatus      |
| LGDVLR           | 7  | Salty, umami, sour                                | Trachinotus ovatus      |
| SEEK             | 4  | Umami, astringent, bitter                         | Ruditapes philippinarum |
| KSAEN            | 5  | Umami, sour, sweet                                | Ruditapes philippinarum |
| HNESQN           | 6  | Umami, sour, salty                                | Ruditapes philippinarum |
| KEMQKN           | 6  | Umami, sour                                       | Ruditapes philippinarum |
| KGGGGP           | 6  | Slight umami, sour                                | Ruditapes philippinarum |
| TGDPEK           | 6  | Slight umami, sour                                | Ruditapes philippinarum |
| TYLPVH           | 6  | Umami, sour, astringent, bitter                   | Ruditapes philippinarum |
| AGAGPTP          | 7  | Umami, sour, astringent                           | Ruditapes philippinarum |
| PAATIPE          | 7  | Umami, sweet, sour, bitter                        | Ruditapes philippinarum |
| RGEPNND          | 7  | Umami, sour, astringent                           | Ruditapes philippinarum |
| GRVSNCAA         | 8  | Umami, sweet, astringent                          | Ruditapes philippinarum |

|              |    |                                                  |                           |                                |
|--------------|----|--------------------------------------------------|---------------------------|--------------------------------|
| QIEELEGK     | 8  | Umami, astringent                                | Ruditapes philippinarum   |                                |
| TDVEQEGD     | 8  | Umami, sour, astringent                          | Ruditapes philippinarum   |                                |
| GPAGPAGPR    | 9  | Sweetness, umami                                 | Ruditapes philippinarum   |                                |
| DALKKK       | 6  | Strong umami, strong sweet                       | Tilapia lower jaw         |                                |
| STELFK       | 6  | Strong umami, sweet, salty                       | Tilapia lower jaw         |                                |
| VADLMR       | 6  | Strong umami, obvious sweet                      | Tilapia lower jaw         |                                |
| FVGLQER      | 7  | Umami, slight sweet and salty                    | Tilapia lower jaw         |                                |
| VVLNPVARVE   | 10 | Strong umami, strong sweet                       | Tilapia lower jaw         |                                |
| HFR          | 3  | Bitter, astringent flavor, kokumi                | Takifugu obscurus         |                                |
| RPHR         | 4  | Reagent flavor, irritant, bitter, kokumi         | Takifugu obscurus         |                                |
| NSNDN        | 5  | Reagent flavor, the flavor of disinfectant fluid | Takifugu obscurus         |                                |
| RPWHR        | 5  | Reagent flavor, capsule flavor, irritant, bitter | Takifugu obscurus         |                                |
| RWDGRG       | 6  | Kokumi                                           | Takifugu obscurus         |                                |
| NEY          | 3  | Bland, tasteless                                 | Peanut protein            |                                |
| GGITETW      | 7  | Bland, tasteless                                 | Peanut protein            |                                |
| RFPHADF      | 7  | Strong bitter, astringent                        | Peanut protein            |                                |
| YYGNSA       | 7  | Sour, sweet, astringent                          | Volvariella volvacea      |                                |
| VF           | 2  |                                                  | Shiitake mushroom         |                                |
| YNEYPLGR     | 9  | Umami, sweet, slight                             | Leccinum extremiorientale |                                |
| FNEIKETST    | 10 | Rich umami, sweet                                | Leccinum extremiorientale |                                |
| DQEDLDESIGVK | 13 | Umami, sweet, slight sour                        | Leccinum extremiorientale |                                |
| EEEQ         | 4  | Umami, kokumi                                    |                           | 10.1016/j.tifs.2019.04.008     |
| GGNP         | 4  | Umami, sweet                                     |                           |                                |
| VDR          | 3  | Umami, sour, astringent                          |                           |                                |
| DPQ          | 3  | Umami, astringent                                |                           |                                |
| FT           | 2  | Sour, astringent, umami-enhancing                |                           |                                |
| FK           | 2  | Slight sweet, umami-enhancing                    |                           |                                |
| SE           | 2  | Umami                                            |                           |                                |
| ADE          | 3  | sweet, sour, bitter, umami-enhancing             |                           |                                |
| AED          | 3  | sour, umami-enhancing                            |                           |                                |
| SPE          | 3  | salt, sour, umami-enhancing                      |                           |                                |
| FSGLDGAK     | 8  | Umami, Sour                                      | porcine bone soup         | 10.1016/j.foodchem.2022.132870 |
| FSGLDGSK     | 8  | Umami, Sour, Weak Bitter                         | porcine bone soup         |                                |
| AL           | 2  |                                                  | yeast extract             | 10.1021/acs.jafc.0c02797       |
| AP           | 2  |                                                  | chicken soup              |                                |

---

|           |   |                   |
|-----------|---|-------------------|
| AV        | 2 | yeast extract     |
| AY        | 2 | yeast extract     |
| DEEGST    | 6 | Fish protein      |
| DEGD      | 4 | Fish protein      |
| DEGSD     | 5 | Fish protein      |
| DEGSE     | 5 | Fish protein      |
| DESD      | 4 | Fish protein      |
| DESTE     | 5 | Fish protein      |
| DGSE      | 4 | Fish protein      |
| ECG       | 3 | yeast extract     |
| EGA       | 3 | Fish protein      |
| EID       | 3 | Fish protein      |
| EILE      | 4 | Fish protein      |
| ENE       | 3 | fish              |
| EVG       | 3 | beer              |
| FQP       | 3 | peanut protein    |
| GL        | 2 | ham               |
| GY        | 2 | peanut protein    |
| ID        | 2 | Fish protein      |
| IE        | 2 | Fish protein      |
| IEE       | 3 | Fish protein      |
| LA        | 2 | yeast extract     |
| LK        | 2 | yeast extract     |
| LQ        | 2 | yeast extract     |
| LT        | 2 | yeast extract     |
| QEELINEL  | 8 | Raw milk, cheese  |
| SD        | 2 | Fish protein      |
| TF        | 2 | peanut protein    |
| TP        | 2 | peanut protein    |
| YE        | 2 | yeast extract     |
| YKCKDXXLR | 9 | Takifugu obscurus |
| SF        | 2 |                   |
| LGAGGSLA  | 8 |                   |
| KGNEESLA  | 8 |                   |
| LDL       | 3 |                   |
| DDDD      | 4 |                   |
| VEL       | 3 |                   |
| KE        | 2 |                   |
| KA        | 2 |                   |
| HN        | 2 |                   |

---

UMP-TR dataset

UMP-IND dataset  
10.1016/j.foodres.2019.03.001

---

|                |    |                                                    |                                |
|----------------|----|----------------------------------------------------|--------------------------------|
| PT             | 2  |                                                    |                                |
| SG             | 2  |                                                    |                                |
| NT             | 2  |                                                    |                                |
| CV             | 2  |                                                    |                                |
| LP             | 2  |                                                    |                                |
| KV             | 2  |                                                    |                                |
| GQEDYDRLRPL    | 11 |                                                    | 10.1016/j.ultsonch.2022.106206 |
| VVVGTPGRVF     | 10 |                                                    |                                |
| ESPERPFL       | 8  |                                                    |                                |
| HLYHPVPIEE     | 10 |                                                    |                                |
| EGTAG          | 5  | Hypsizygos marmoreus                               | 10.1016/j.foodchem.2022.134163 |
| MTNLLEDLSFR    | 11 |                                                    | 10.1039/D0FO03326J             |
| GFGDSCTPGKNER  | 13 |                                                    |                                |
| YADSNIQINGTDR  | 13 |                                                    |                                |
| AREIALQELGEQAK | 14 |                                                    |                                |
| IQQDDCK        | 7  |                                                    |                                |
| QAEADMAR       | 8  |                                                    |                                |
| AGFMPLP        | 7  |                                                    | 10.1016/j.foodchem.2021.131996 |
| APYSGY         | 6  |                                                    |                                |
| PPMF           | 4  |                                                    |                                |
| SLSSLMK        | 7  |                                                    |                                |
| VAMNPVDHPH     | 10 |                                                    |                                |
| DEK            | 3  |                                                    | 10.1111/ijfs.15166             |
| EVAEALDAPKTT   | 12 | strong umami and sweet, litter<br>salty and bitter | 10.1016/j.foodchem.2022.134137 |
| AVLEEAQKVELK   | 12 | umami, sweet, bitter, salty                        |                                |
| AEDLSTLR       | 8  | strong umami, litter bitter                        |                                |
| KVDVDSLK       | 8  | umami, sweet, bitter, salty                        |                                |
| PPQEAQF        | 8  |                                                    | 10.1016/j.foodchem.2022.134414 |
| AEEHVEAVN      | 9  |                                                    |                                |
| NEFGYSNR       | 8  |                                                    |                                |
| LPLQD          | 5  |                                                    |                                |
| GPSGKLW        | 7  |                                                    |                                |
| DGGRY          | 6  |                                                    |                                |
| GPVGYGYE       | 8  |                                                    |                                |
| GPVGYGYEY      | 9  |                                                    |                                |
| AGPSIVH        | 7  |                                                    |                                |
| LERM           | 4  | Umami, astringent and slight<br>bitter             | 10.1016/j.foodchem.2022.134562 |
| FGEKL          | 5  | Umami, astringent and salty                        |                                |

---

|            |    |                                      |                                |
|------------|----|--------------------------------------|--------------------------------|
| ELLKLH     | 6  | Umami and sour                       |                                |
| LLEEKLK    | 7  | Umami, astringent and slight sweet   |                                |
| KSQAKEV    | 7  | slight umami, sweet and kokumi       |                                |
| AQKDEEKME  | 9  | umami , slight salty and sour        |                                |
| EANK       | 4  |                                      | 10.1016/j.fshw.2022.07.026     |
| EEAK       | 4  |                                      |                                |
| EMQK       | 4  |                                      |                                |
| RD         | 2  | Umami                                | 10.1016/j.foodchem.2022.132175 |
| DGV        | 3  | Umami                                |                                |
| LMSL       | 4  | Umami, bitter, astringen,            | 10.1016/j.foodchem.2022.133504 |
| EFLKEQF    | 7  | slight umami and sour                |                                |
| DEELNKL    | 8  | slight umami, bitter, salty and sour |                                |
| KALSEELDN  | 9  | umami, slight sweet                  |                                |
| TETKTFTLK  | 9  | umami, slight sweet, sour and bitter |                                |
| AAEAKLELLE | 10 | umami, slight salty and sour         |                                |
| KETLEQEKSG | 10 | umami, slight sweet and sour         |                                |
| TWKE       | 4  | umami, slight sour                   |                                |
| DLRAD      | 5  | umami, kokumi, slight sour           |                                |
| DDLDR      | 5  | umami, slight sour                   |                                |
| KSLEEA     | 6  | umami, slight sweet and sour         |                                |
| MQAMKLEK   | 8  | umami, slight sweet                  |                                |
| DQLEKQVK   | 8  | umami, slight sweet                  |                                |
| AKALKEEDL  | 9  | umami, slight sweet and sour         |                                |
| TGFLPEEYMK | 10 | slight umami                         |                                |
| AMKLEKENAL | 10 | umami, slight sweet and sour         |                                |
| DGF        | 3  | Umami, astringent                    | 10.1016/j.foodchem.2022.133835 |
| HHYE       | 4  | Sour, umami, astringent              |                                |
| KCGQ       | 4  | Sour, umami, salt, astringent        |                                |
| EPLCNQ     | 6  |                                      | 10.1016/j.jfca.2022.104530     |
| SGCVNEL    | 7  |                                      |                                |
| PHEMQ      | 5  |                                      |                                |
| SEPSHF     | 6  |                                      |                                |
| ESCAPQL    | 7  |                                      |                                |
| HA         | 2  | Umami, bitter                        | 10.1016/j.foodres.2018.11.002  |
| DFE        | 3  | Umami, sour, kokumi,                 | 10.1016/j.foodchem.2022.134583 |

---

|              |    |                                        |                            |
|--------------|----|----------------------------------------|----------------------------|
| LREY         | 4  | astrigent                              |                            |
| HEAL         | 4  | Umami, sour and bitter                 | 10.1002/jsfa.12319         |
| LAKVH        | 5  | Umami, salt                            |                            |
| FQKVVA       | 6  | Umami                                  |                            |
| HVKELE       | 6  | Umami, sweet and salt                  |                            |
| AEVKKAP      | 7  | Umami, sweet                           |                            |
| EAVEKPQS     | 8  | Umami, sweet                           |                            |
| KALSEEL      | 7  | Umami                                  |                            |
| KKMFETES     | 8  | Umami, sour                            |                            |
| EFHNR        | 5  |                                        |                            |
| DPLKY        | 5  |                                        |                            |
| TPPKID       | 6  |                                        |                            |
| EAFRVL       | 6  |                                        |                            |
| ADSYRLP      | 7  |                                        |                            |
| IKDPHVD      | 7  |                                        |                            |
| SLSSLMF      | 7  |                                        |                            |
| DDF          | 3  |                                        | 10.1039/D2FO03776A         |
| ADC          | 3  |                                        |                            |
| GGR          | 3  |                                        |                            |
| DNW          | 3  |                                        |                            |
| QDF          | 3  |                                        |                            |
| IGDM         | 4  |                                        |                            |
| DCIY         | 4  |                                        |                            |
| AGCD         | 4  |                                        |                            |
| QDTW         | 4  |                                        |                            |
| SGDAW        | 5  |                                        |                            |
| NDDGW        | 5  |                                        |                            |
| SDLYVR       | 6  | umami-enhancing                        | 10.3390/molecules27092853  |
| GSAQA        | 5  |                                        | 10.1007/s00217-022-04061-4 |
| ISKEK        | 5  |                                        |                            |
| LPKERLYV     | 8  |                                        |                            |
| VENQQLAL     | 8  |                                        |                            |
| PKALSAFK     | 8  | slight umami, sour, umami<br>enhancing | 10.1021/acs.jafc.2c09178   |
| NKHGSGK      | 7  | strong umami, sour, umami<br>enhancing |                            |
| SADETPR      | 7  | umami, sour, sweet, umami<br>enhancing |                            |
| EIKKAALDANEK | 12 | strong umami, sour, umami              |                            |

---

---

|              |    |                                        |                                    |
|--------------|----|----------------------------------------|------------------------------------|
| DALAHK       | 6  | enhancing<br>slight umami, sour, umami |                                    |
| LDDGR        | 5  | enhancing<br>strong umami, sour, umami |                                    |
| GHENQR       | 6  | enhancing<br>umami, sour, umami        |                                    |
| GLPD         | 4  |                                        | 10.3390/foods8020043               |
| GHGD         | 4  |                                        |                                    |
| HE           | 2  | Umami, sweet, sour                     | 10.1016/j.biomaterials.2022.121697 |
| HD           | 2  | Umami, sour                            |                                    |
| EH           | 2  | Umami, sour                            |                                    |
| DH           | 2  | Umami, sweet, sour                     |                                    |
| EQ           | 2  | Umami, sour, salt                      |                                    |
| DQ           | 2  | Umami, sweet, sour                     |                                    |
| DN           | 2  | Umami, sour                            |                                    |
| DY           | 2  | Umami, sweet, astringent               |                                    |
| DM           | 2  | Umami, astringent                      |                                    |
| DI           | 2  | Umami, sweet, sour                     |                                    |
| DV           | 2  | Umami, sweet, sour, astringent         |                                    |
| QE           | 2  | Umami, sweet, sour                     |                                    |
| QD           | 2  | Umami, sweet, sour                     |                                    |
| NE           | 2  | Umami, sour                            |                                    |
| ND           | 2  | Umami, sour                            |                                    |
| ALPAEV       | 6  |                                        | 10.1016/j.foodchem.2022.134812     |
| EQEEK        | 5  |                                        |                                    |
| IQEL         | 4  |                                        |                                    |
| KAPSTM       | 6  |                                        |                                    |
| NGG          | 3  |                                        |                                    |
| PLA          | 3  |                                        |                                    |
| QEEK         | 4  |                                        |                                    |
| QP           | 2  |                                        |                                    |
| SAEQT        | 5  |                                        |                                    |
| SFG          | 3  |                                        |                                    |
| SGLAEGSG     | 8  |                                        |                                    |
| SGSLGGGSG    | 9  |                                        |                                    |
| SSAVK        | 5  |                                        |                                    |
| TPE          | 3  |                                        |                                    |
| VEAGP        | 5  |                                        |                                    |
| VES          | 3  |                                        |                                    |
| VTADESQQDVLV | 12 |                                        |                                    |

---

---

|               |    |                            |                                |
|---------------|----|----------------------------|--------------------------------|
| VYPPFGPL      | 8  |                            |                                |
| YIHGGS        | 6  |                            |                                |
| ATQ           | 3  | Umami, Sweet               |                                |
| LPG           | 3  | Umami                      |                                |
| ECH           | 3  | Umami, Sweet               |                                |
| NQS           | 3  | Umami, Sweet               |                                |
| GPPDER        | 6  | Umami                      |                                |
| AGPPVGPAG     | 9  |                            | 10.1111/ijfs.14655             |
| DAINWTPPGEIAH | 13 |                            | 10.1111/1750-3841.15751        |
| FLGDEETVR     | 9  |                            |                                |
| GVDEATHIELTK  | 13 |                            |                                |
| PAGPVGPVG     | 9  |                            |                                |
| VAPEEHPTL     | 9  |                            |                                |
| NALNDITSL     | 9  | umami-enhancing            | 10.1016/j.foodchem.2022.132455 |
| TFYNELR       | 7  | Weak umami, Weak saltiness | 10.1111/ijfs.15883             |
| TLFQPSF       | 7  | Umami, weak saltiness      |                                |
| LYANNVL       | 7  | Umami                      |                                |
| FAGDDAPRAVFPS | 13 | Umami, weak saltiness      |                                |

---

Notes: Fish protein hydrolysate (FPH); Chicken enzymatic hydrolysate (CEH); Peanut hydrolysate (PH); Sunflower seeds hydrolysate (SSH); Parma ham hydrolysate (PHH); Brown rice hydrolysate (BRH); *Takifugu obscurus* hydrolysate (TOH); Yeast extract (YE); Silkworm pupa hydrolysate (SPH); Proteinase modified soybean protein (PMSP).



**Table S4.** The number and frequency ( $A_{\text{umami}}$  value) of umami peptides theoretically generated from *in silico* proteolysis of porcine type I collagen  $\alpha 1$  and  $\alpha 2$  chains by different enzymes.

| Enzyme combination | pork type I collagen $\alpha 1$ chain |                          | pork type I collagen $\alpha 2$ chain |                          |
|--------------------|---------------------------------------|--------------------------|---------------------------------------|--------------------------|
|                    | Number of umami peptides              | $A_{\text{umami}}$ value | Number of umami peptides              | $A_{\text{umami}}$ value |
| 11                 | 10                                    | 0.0068                   | 12                                    | 0.0088                   |
| 12                 | 2                                     | 0.0014                   | 0                                     | 0.0000                   |
| 13                 | 5                                     | 0.0034                   | 5                                     | 0.0037                   |
| 14                 | 29                                    | 0.0198                   | 28                                    | 0.0205                   |
| 15                 | 73                                    | 0.0498                   | 54                                    | 0.0396                   |
| 16                 | 3                                     | 0.0020                   | 1                                     | 0.0007                   |
| 17                 | 2                                     | 0.0014                   | 0                                     | 0.0000                   |
| 18                 | 17                                    | 0.0116                   | 25                                    | 0.0183                   |
| 19                 | 37                                    | 0.0252                   | 65                                    | 0.0476                   |
| 20                 | 2                                     | 0.0014                   | 0                                     | 0.0000                   |
| 21                 | 8                                     | 0.0055                   | 9                                     | 0.0066                   |
| 22                 | 1                                     | 0.0007                   | 0                                     | 0.0000                   |
| 23                 | 8                                     | 0.0055                   | 7                                     | 0.0051                   |
| 24                 | 58                                    | 0.0396                   | 61                                    | 0.0447                   |
| 25                 | 55                                    | 0.0375                   | 49                                    | 0.0359                   |
| 26                 | 30                                    | 0.0205                   | 26                                    | 0.0190                   |
| 27                 | 8                                     | 0.0055                   | 7                                     | 0.0051                   |
| 28                 | 0                                     | 0.0000                   | 0                                     | 0.0000                   |
| 29                 | 5                                     | 0.0034                   | 7                                     | 0.0051                   |
| 30                 | 84                                    | 0.0573                   | 70                                    | 0.0513                   |
| 31                 | 0                                     | 0.0000                   | 0                                     | 0.0000                   |
| 32                 | 2                                     | 0.0014                   | 0                                     | 0.0000                   |
| 33                 | 78                                    | 0.0532                   | 69                                    | 0.0505                   |
| 34                 | 31                                    | 0.0211                   | 35                                    | 0.0256                   |
| 36                 | 5                                     | 0.0034                   | 5                                     | 0.0037                   |
| 37                 | 24                                    | 0.0164                   | 20                                    | 0.0147                   |
| 38                 | 6                                     | 0.0041                   | 4                                     | 0.0029                   |
| 39                 | 60                                    | 0.0409                   | 74                                    | 0.0542                   |
| 40                 | 8                                     | 0.0055                   | 14                                    | 0.0103                   |
| 41                 | 10                                    | 0.0068                   | 12                                    | 0.0088                   |
| 44                 | 11                                    | 0.0075                   | 8                                     | 0.0059                   |
| 11+12              | 22                                    | 0.0150                   | 18                                    | 0.0132                   |
| 11+13              | 10                                    | 0.0068                   | 12                                    | 0.0088                   |
| 11+14              | 32                                    | 0.0218                   | 34                                    | 0.0249                   |
| 11+15              | 83                                    | 0.0566                   | 69                                    | 0.0505                   |
| 11+16              | 19                                    | 0.0130                   | 22                                    | 0.0161                   |
| 11+17              | 13                                    | 0.0089                   | 19                                    | 0.0139                   |
| 11+18              | 19                                    | 0.0130                   | 17                                    | 0.0125                   |
| 11+19              | 39                                    | 0.0266                   | 40                                    | 0.0293                   |
| 11+20              | 22                                    | 0.0150                   | 18                                    | 0.0132                   |

|       |    |        |    |        |
|-------|----|--------|----|--------|
| 11+21 | 10 | 0.0068 | 12 | 0.0088 |
| 11+22 | 16 | 0.0109 | 17 | 0.0125 |
| 11+23 | 10 | 0.0068 | 12 | 0.0088 |
| 11+24 | 73 | 0.0498 | 77 | 0.0564 |
| 11+25 | 58 | 0.0396 | 56 | 0.0410 |
| 11+26 | 39 | 0.0266 | 39 | 0.0286 |
| 11+27 | 9  | 0.0061 | 12 | 0.0088 |
| 11+28 | 15 | 0.0102 | 18 | 0.0132 |
| 11+29 | 10 | 0.0068 | 12 | 0.0088 |
| 11+30 | 94 | 0.0641 | 78 | 0.0571 |
| 11+31 | 10 | 0.0068 | 14 | 0.0103 |
| 11+32 | 22 | 0.0150 | 18 | 0.0132 |
| 11+33 | 93 | 0.0634 | 82 | 0.0601 |
| 11+34 | 38 | 0.0259 | 45 | 0.0330 |
| 11+36 | 10 | 0.0068 | 12 | 0.0088 |
| 11+37 | 36 | 0.0246 | 31 | 0.0227 |
| 11+38 | 16 | 0.0109 | 21 | 0.0154 |
| 11+39 | 59 | 0.0402 | 71 | 0.0520 |
| 11+40 | 11 | 0.0075 | 7  | 0.0051 |
| 11+41 | 12 | 0.0082 | 18 | 0.0132 |
| 11+44 | 26 | 0.0177 | 33 | 0.0242 |
| 12+13 | 14 | 0.0095 | 10 | 0.0073 |
| 12+14 | 41 | 0.0280 | 37 | 0.0271 |
| 12+15 | 91 | 0.0621 | 68 | 0.0498 |
| 12+16 | 11 | 0.0075 | 6  | 0.0044 |
| 12+17 | 21 | 0.0143 | 21 | 0.0154 |
| 12+18 | 34 | 0.0232 | 38 | 0.0278 |
| 12+19 | 64 | 0.0437 | 65 | 0.0476 |
| 12+20 | 2  | 0.0014 | 0  | 0.0000 |
| 12+21 | 20 | 0.0136 | 17 | 0.0125 |
| 12+22 | 2  | 0.0014 | 0  | 0.0000 |
| 12+23 | 18 | 0.0123 | 14 | 0.0103 |
| 12+24 | 69 | 0.0471 | 62 | 0.0454 |
| 12+25 | 55 | 0.0375 | 47 | 0.0344 |
| 12+26 | 46 | 0.0314 | 32 | 0.0234 |
| 12+27 | 18 | 0.0123 | 14 | 0.0103 |
| 12+28 | 2  | 0.0014 | 0  | 0.0000 |
| 12+29 | 14 | 0.0095 | 11 | 0.0081 |
| 12+30 | 78 | 0.0532 | 57 | 0.0418 |
| 12+31 | 3  | 0.0020 | 3  | 0.0022 |
| 12+32 | 2  | 0.0014 | 0  | 0.0000 |
| 12+33 | 78 | 0.0532 | 69 | 0.0505 |
| 12+34 | 61 | 0.0416 | 62 | 0.0454 |
| 12+36 | 14 | 0.0095 | 10 | 0.0073 |

|       |     |        |     |        |
|-------|-----|--------|-----|--------|
| 12+37 | 41  | 0.0280 | 35  | 0.0256 |
| 12+38 | 16  | 0.0109 | 11  | 0.0081 |
| 12+39 | 55  | 0.0375 | 68  | 0.0498 |
| 12+40 | 23  | 0.0157 | 25  | 0.0183 |
| 12+41 | 24  | 0.0164 | 23  | 0.0168 |
| 12+44 | 38  | 0.0259 | 33  | 0.0242 |
| 13+14 | 29  | 0.0198 | 28  | 0.0205 |
| 13+15 | 75  | 0.0512 | 56  | 0.0410 |
| 13+16 | 13  | 0.0089 | 13  | 0.0095 |
| 13+17 | 7   | 0.0048 | 9   | 0.0066 |
| 13+18 | 15  | 0.0102 | 16  | 0.0117 |
| 13+19 | 39  | 0.0266 | 40  | 0.0293 |
| 13+20 | 14  | 0.0095 | 10  | 0.0073 |
| 13+21 | 8   | 0.0055 | 9   | 0.0066 |
| 13+22 | 10  | 0.0068 | 10  | 0.0073 |
| 13+23 | 7   | 0.0048 | 7   | 0.0051 |
| 13+24 | 54  | 0.0368 | 61  | 0.0447 |
| 13+25 | 55  | 0.0375 | 48  | 0.0352 |
| 13+26 | 31  | 0.0211 | 27  | 0.0198 |
| 13+27 | 8   | 0.0055 | 7   | 0.0051 |
| 13+28 | 9   | 0.0061 | 10  | 0.0073 |
| 13+29 | 5   | 0.0034 | 7   | 0.0051 |
| 13+30 | 84  | 0.0573 | 62  | 0.0454 |
| 13+31 | 5   | 0.0034 | 6   | 0.0044 |
| 13+32 | 14  | 0.0095 | 10  | 0.0073 |
| 13+33 | 80  | 0.0546 | 69  | 0.0505 |
| 13+34 | 28  | 0.0191 | 28  | 0.0205 |
| 13+36 | 5   | 0.0034 | 5   | 0.0037 |
| 13+37 | 27  | 0.0184 | 22  | 0.0161 |
| 13+38 | 11  | 0.0075 | 9   | 0.0066 |
| 13+39 | 60  | 0.0409 | 74  | 0.0542 |
| 13+40 | 8   | 0.0055 | 7   | 0.0051 |
| 13+41 | 10  | 0.0068 | 12  | 0.0088 |
| 13+44 | 17  | 0.0116 | 20  | 0.0147 |
| 14+15 | 103 | 0.0703 | 84  | 0.0615 |
| 14+16 | 29  | 0.0198 | 28  | 0.0205 |
| 14+17 | 46  | 0.0314 | 42  | 0.0308 |
| 14+18 | 43  | 0.0293 | 30  | 0.0220 |
| 14+19 | 47  | 0.0321 | 51  | 0.0374 |
| 14+20 | 41  | 0.0280 | 37  | 0.0271 |
| 14+21 | 29  | 0.0198 | 28  | 0.0205 |
| 14+22 | 36  | 0.0246 | 34  | 0.0249 |
| 14+23 | 29  | 0.0198 | 28  | 0.0205 |
| 14+24 | 135 | 0.0921 | 125 | 0.0916 |

|       |     |        |     |        |
|-------|-----|--------|-----|--------|
| 14+25 | 113 | 0.0771 | 105 | 0.0769 |
| 14+26 | 50  | 0.0341 | 48  | 0.0352 |
| 14+27 | 29  | 0.0198 | 28  | 0.0205 |
| 14+28 | 34  | 0.0232 | 34  | 0.0249 |
| 14+29 | 29  | 0.0198 | 28  | 0.0205 |
| 14+30 | 49  | 0.0334 | 100 | 0.0733 |
| 14+31 | 32  | 0.0218 | 28  | 0.0205 |
| 14+32 | 41  | 0.0280 | 37  | 0.0271 |
| 14+33 | 137 | 0.0935 | 123 | 0.0901 |
| 14+34 | 107 | 0.0730 | 100 | 0.0733 |
| 14+36 | 29  | 0.0198 | 28  | 0.0205 |
| 14+37 | 37  | 0.0252 | 31  | 0.0227 |
| 14+38 | 37  | 0.0252 | 36  | 0.0264 |
| 14+39 | 35  | 0.0239 | 27  | 0.0198 |
| 14+40 | 49  | 0.0334 | 40  | 0.0293 |
| 14+41 | 34  | 0.0232 | 38  | 0.0278 |
| 14+44 | 54  | 0.0368 | 46  | 0.0337 |
| 15+16 | 99  | 0.0675 | 79  | 0.0579 |
| 15+17 | 58  | 0.0396 | 45  | 0.0330 |
| 15+18 | 43  | 0.0293 | 35  | 0.0256 |
| 15+19 | 66  | 0.0450 | 59  | 0.0432 |
| 15+20 | 91  | 0.0621 | 78  | 0.0571 |
| 15+21 | 77  | 0.0525 | 59  | 0.0432 |
| 15+22 | 98  | 0.0668 | 71  | 0.0520 |
| 15+23 | 64  | 0.0437 | 56  | 0.0410 |
| 15+24 | 81  | 0.0553 | 67  | 0.0491 |
| 15+25 | 95  | 0.0648 | 65  | 0.0476 |
| 15+26 | 73  | 0.0498 | 54  | 0.0396 |
| 15+27 | 74  | 0.0505 | 56  | 0.0410 |
| 15+28 | 90  | 0.0614 | 66  | 0.0484 |
| 15+29 | 76  | 0.0518 | 72  | 0.0527 |
| 15+30 | 95  | 0.0648 | 59  | 0.0432 |
| 15+31 | 63  | 0.0430 | 48  | 0.0352 |
| 15+32 | 91  | 0.0621 | 68  | 0.0498 |
| 15+33 | 81  | 0.0553 | 66  | 0.0484 |
| 15+34 | 73  | 0.0498 | 54  | 0.0396 |
| 15+36 | 74  | 0.0505 | 55  | 0.0403 |
| 15+37 | 72  | 0.0491 | 51  | 0.0374 |
| 15+38 | 73  | 0.0498 | 54  | 0.0396 |
| 15+39 | 18  | 0.0123 | 22  | 0.0161 |
| 15+40 | 52  | 0.0355 | 43  | 0.0315 |
| 15+41 | 66  | 0.0450 | 48  | 0.0352 |
| 15+44 | 49  | 0.0334 | 39  | 0.0286 |
| 16+17 | 21  | 0.0143 | 12  | 0.0088 |

|       |     |        |     |        |
|-------|-----|--------|-----|--------|
| 16+18 | 65  | 0.0443 | 50  | 0.0366 |
| 16+19 | 38  | 0.0259 | 37  | 0.0271 |
| 16+20 | 11  | 0.0075 | 5   | 0.0037 |
| 16+21 | 16  | 0.0109 | 17  | 0.0125 |
| 16+22 | 8   | 0.0055 | 5   | 0.0037 |
| 16+23 | 17  | 0.0116 | 15  | 0.0110 |
| 16+24 | 115 | 0.0784 | 110 | 0.0806 |
| 16+25 | 105 | 0.0716 | 98  | 0.0718 |
| 16+26 | 48  | 0.0327 | 42  | 0.0308 |
| 16+27 | 17  | 0.0116 | 15  | 0.0110 |
| 16+28 | 6   | 0.0041 | 3   | 0.0022 |
| 16+29 | 13  | 0.0089 | 15  | 0.0110 |
| 16+30 | 111 | 0.0757 | 88  | 0.0645 |
| 16+31 | 7   | 0.0048 | 2   | 0.0015 |
| 16+32 | 11  | 0.0075 | 6   | 0.0044 |
| 16+33 | 120 | 0.0819 | 108 | 0.0791 |
| 16+34 | 90  | 0.0614 | 87  | 0.0637 |
| 16+36 | 13  | 0.0089 | 13  | 0.0095 |
| 16+37 | 26  | 0.0177 | 20  | 0.0147 |
| 16+38 | 16  | 0.0109 | 12  | 0.0088 |
| 16+39 | 55  | 0.0375 | 63  | 0.0462 |
| 16+40 | 57  | 0.0389 | 43  | 0.0315 |
| 16+41 | 27  | 0.0184 | 26  | 0.0190 |
| 16+44 | 34  | 0.0232 | 21  | 0.0154 |
| 17+18 | 23  | 0.0157 | 30  | 0.0220 |
| 17+19 | 38  | 0.0259 | 37  | 0.0271 |
| 17+20 | 21  | 0.0143 | 21  | 0.0154 |
| 17+21 | 11  | 0.0075 | 14  | 0.0103 |
| 17+22 | 14  | 0.0095 | 9   | 0.0066 |
| 17+23 | 11  | 0.0075 | 10  | 0.0073 |
| 17+24 | 56  | 0.0382 | 61  | 0.0447 |
| 17+25 | 44  | 0.0300 | 29  | 0.0212 |
| 17+26 | 49  | 0.0334 | 41  | 0.0300 |
| 17+27 | 11  | 0.0075 | 10  | 0.0073 |
| 17+28 | 13  | 0.0089 | 9   | 0.0066 |
| 17+29 | 7   | 0.0048 | 12  | 0.0088 |
| 17+30 | 59  | 0.0402 | 48  | 0.0352 |
| 17+31 | 2   | 0.0014 | 0   | 0.0000 |
| 17+32 | 21  | 0.0143 | 21  | 0.0154 |
| 17+33 | 58  | 0.0396 | 53  | 0.0388 |
| 17+34 | 41  | 0.0280 | 44  | 0.0322 |
| 17+36 | 7   | 0.0048 | 9   | 0.0066 |
| 17+37 | 40  | 0.0273 | 30  | 0.0220 |
| 17+38 | 12  | 0.0082 | 7   | 0.0051 |

|       |    |        |    |        |
|-------|----|--------|----|--------|
| 17+39 | 60 | 0.0409 | 74 | 0.0542 |
| 17+40 | 14 | 0.0095 | 22 | 0.0161 |
| 17+41 | 25 | 0.0171 | 18 | 0.0132 |
| 17+44 | 11 | 0.0075 | 8  | 0.0059 |
| 18+19 | 72 | 0.0491 | 52 | 0.0381 |
| 18+20 | 34 | 0.0232 | 38 | 0.0278 |
| 18+21 | 16 | 0.0109 | 16 | 0.0117 |
| 18+22 | 23 | 0.0157 | 30 | 0.0220 |
| 18+23 | 16 | 0.0109 | 15 | 0.0110 |
| 18+24 | 67 | 0.0457 | 83 | 0.0608 |
| 18+25 | 59 | 0.0402 | 69 | 0.0505 |
| 18+26 | 18 | 0.0123 | 18 | 0.0132 |
| 18+27 | 16 | 0.0109 | 15 | 0.0110 |
| 18+28 | 20 | 0.0136 | 30 | 0.0220 |
| 18+29 | 15 | 0.0102 | 17 | 0.0125 |
| 18+30 | 62 | 0.0423 | 49 | 0.0359 |
| 18+31 | 17 | 0.0116 | 25 | 0.0183 |
| 18+32 | 34 | 0.0232 | 38 | 0.0278 |
| 18+33 | 90 | 0.0614 | 93 | 0.0681 |
| 18+34 | 46 | 0.0314 | 67 | 0.0491 |
| 18+36 | 15 | 0.0102 | 16 | 0.0117 |
| 18+37 | 42 | 0.0286 | 30 | 0.0220 |
| 18+38 | 28 | 0.0191 | 33 | 0.0242 |
| 18+39 | 54 | 0.0368 | 69 | 0.0505 |
| 18+40 | 17 | 0.0116 | 25 | 0.0183 |
| 18+41 | 17 | 0.0116 | 16 | 0.0117 |
| 18+44 | 38 | 0.0259 | 41 | 0.0300 |
| 19+20 | 64 | 0.0437 | 65 | 0.0476 |
| 19+21 | 39 | 0.0266 | 40 | 0.0293 |
| 19+22 | 56 | 0.0382 | 53 | 0.0388 |
| 19+23 | 39 | 0.0266 | 40 | 0.0293 |
| 19+24 | 95 | 0.0648 | 91 | 0.0667 |
| 19+25 | 73 | 0.0498 | 60 | 0.0440 |
| 19+26 | 86 | 0.0587 | 82 | 0.0601 |
| 19+27 | 39 | 0.0266 | 40 | 0.0293 |
| 19+28 | 55 | 0.0375 | 54 | 0.0396 |
| 19+29 | 39 | 0.0266 | 40 | 0.0293 |
| 19+30 | 72 | 0.0491 | 62 | 0.0454 |
| 19+31 | 38 | 0.0259 | 37 | 0.0271 |
| 19+32 | 64 | 0.0437 | 65 | 0.0476 |
| 19+33 | 90 | 0.0614 | 76 | 0.0557 |
| 19+34 | 83 | 0.0566 | 78 | 0.0571 |
| 19+36 | 39 | 0.0266 | 38 | 0.0278 |
| 19+37 | 46 | 0.0314 | 38 | 0.0278 |

|       |    |        |    |        |
|-------|----|--------|----|--------|
| 19+38 | 50 | 0.0341 | 48 | 0.0352 |
| 19+39 | 55 | 0.0375 | 63 | 0.0462 |
| 19+40 | 64 | 0.0437 | 47 | 0.0344 |
| 19+41 | 59 | 0.0402 | 54 | 0.0396 |
| 19+44 | 50 | 0.0341 | 47 | 0.0344 |
| 20+21 | 20 | 0.0136 | 15 | 0.0110 |
| 20+22 | 2  | 0.0014 | 0  | 0.0000 |
| 20+23 | 18 | 0.0123 | 14 | 0.0103 |
| 20+24 | 69 | 0.0471 | 62 | 0.0454 |
| 20+25 | 55 | 0.0375 | 47 | 0.0344 |
| 20+26 | 46 | 0.0314 | 32 | 0.0234 |
| 20+27 | 18 | 0.0123 | 14 | 0.0103 |
| 20+28 | 2  | 0.0014 | 0  | 0.0000 |
| 20+29 | 14 | 0.0095 | 11 | 0.0081 |
| 20+30 | 81 | 0.0553 | 57 | 0.0418 |
| 20+31 | 3  | 0.0020 | 3  | 0.0022 |
| 20+32 | 2  | 0.0014 | 0  | 0.0000 |
| 20+33 | 78 | 0.0532 | 69 | 0.0505 |
| 20+34 | 61 | 0.0416 | 62 | 0.0454 |
| 20+36 | 14 | 0.0095 | 10 | 0.0073 |
| 20+37 | 41 | 0.0280 | 35 | 0.0256 |
| 20+38 | 16 | 0.0109 | 11 | 0.0081 |
| 20+39 | 55 | 0.0375 | 68 | 0.0498 |
| 20+40 | 24 | 0.0164 | 25 | 0.0183 |
| 20+41 | 24 | 0.0164 | 23 | 0.0168 |
| 20+44 | 38 | 0.0259 | 33 | 0.0242 |
| 21+22 | 14 | 0.0095 | 14 | 0.0103 |
| 21+23 | 8  | 0.0055 | 9  | 0.0066 |
| 21+24 | 69 | 0.0471 | 67 | 0.0491 |
| 21+25 | 55 | 0.0375 | 48 | 0.0352 |
| 21+26 | 36 | 0.0246 | 35 | 0.0256 |
| 21+27 | 8  | 0.0055 | 9  | 0.0066 |
| 21+28 | 13 | 0.0089 | 15 | 0.0110 |
| 21+29 | 8  | 0.0055 | 9  | 0.0066 |
| 21+30 | 91 | 0.0621 | 62 | 0.0454 |
| 21+31 | 8  | 0.0055 | 10 | 0.0073 |
| 21+32 | 19 | 0.0130 | 15 | 0.0110 |
| 21+33 | 92 | 0.0628 | 75 | 0.0549 |
| 21+34 | 34 | 0.0232 | 34 | 0.0249 |
| 21+36 | 8  | 0.0055 | 9  | 0.0066 |
| 21+37 | 33 | 0.0225 | 26 | 0.0190 |
| 21+38 | 14 | 0.0095 | 13 | 0.0095 |
| 21+39 | 59 | 0.0402 | 72 | 0.0527 |
| 21+40 | 9  | 0.0061 | 7  | 0.0051 |

|       |    |        |    |        |
|-------|----|--------|----|--------|
| 21+41 | 10 | 0.0068 | 15 | 0.0110 |
| 21+44 | 21 | 0.0143 | 24 | 0.0176 |
| 22+23 | 13 | 0.0089 | 13 | 0.0095 |
| 22+24 | 58 | 0.0396 | 61 | 0.0447 |
| 22+25 | 55 | 0.0375 | 47 | 0.0344 |
| 22+26 | 41 | 0.0280 | 33 | 0.0242 |
| 22+27 | 13 | 0.0089 | 13 | 0.0095 |
| 22+28 | 1  | 0.0007 | 0  | 0.0000 |
| 22+29 | 10 | 0.0068 | 11 | 0.0081 |
| 22+30 | 84 | 0.0573 | 62 | 0.0454 |
| 22+31 | 1  | 0.0007 | 3  | 0.0022 |
| 22+32 | 2  | 0.0014 | 0  | 0.0000 |
| 22+33 | 78 | 0.0532 | 69 | 0.0505 |
| 22+34 | 52 | 0.0355 | 53 | 0.0388 |
| 22+36 | 10 | 0.0068 | 10 | 0.0073 |
| 22+37 | 35 | 0.0239 | 27 | 0.0198 |
| 22+38 | 13 | 0.0089 | 11 | 0.0081 |
| 22+39 | 55 | 0.0375 | 68 | 0.0498 |
| 22+40 | 14 | 0.0095 | 17 | 0.0125 |
| 22+41 | 17 | 0.0116 | 24 | 0.0176 |
| 22+44 | 24 | 0.0164 | 21 | 0.0154 |
| 23+24 | 63 | 0.0430 | 65 | 0.0476 |
| 23+25 | 55 | 0.0375 | 47 | 0.0344 |
| 23+26 | 35 | 0.0239 | 32 | 0.0234 |
| 23+27 | 8  | 0.0055 | 7  | 0.0051 |
| 23+28 | 13 | 0.0089 | 13 | 0.0095 |
| 23+29 | 8  | 0.0055 | 9  | 0.0066 |
| 23+30 | 88 | 0.0600 | 66 | 0.0484 |
| 23+31 | 8  | 0.0055 | 8  | 0.0059 |
| 23+32 | 18 | 0.0123 | 14 | 0.0103 |
| 23+33 | 87 | 0.0593 | 74 | 0.0542 |
| 23+34 | 32 | 0.0218 | 31 | 0.0227 |
| 23+36 | 8  | 0.0055 | 7  | 0.0051 |
| 23+37 | 34 | 0.0232 | 26 | 0.0190 |
| 23+38 | 14 | 0.0095 | 11 | 0.0081 |
| 23+39 | 60 | 0.0409 | 74 | 0.0542 |
| 23+40 | 8  | 0.0055 | 6  | 0.0044 |
| 23+41 | 10 | 0.0068 | 12 | 0.0088 |
| 23+44 | 22 | 0.0150 | 21 | 0.0154 |
| 24+25 | 68 | 0.0464 | 63 | 0.0462 |
| 24+26 | 79 | 0.0539 | 62 | 0.0454 |
| 24+27 | 66 | 0.0450 | 65 | 0.0476 |
| 24+28 | 59 | 0.0402 | 61 | 0.0447 |
| 24+29 | 60 | 0.0409 | 62 | 0.0454 |



|       |    |        |    |        |
|-------|----|--------|----|--------|
| 24+30 | 71 | 0.0484 | 58 | 0.0425 |
| 24+31 | 60 | 0.0409 | 70 | 0.0513 |
| 24+32 | 69 | 0.0471 | 62 | 0.0454 |
| 24+33 | 77 | 0.0525 | 68 | 0.0498 |
| 24+34 | 58 | 0.0396 | 61 | 0.0447 |
| 24+36 | 58 | 0.0396 | 61 | 0.0447 |
| 24+37 | 80 | 0.0546 | 75 | 0.0549 |
| 24+38 | 59 | 0.0402 | 61 | 0.0447 |
| 24+39 | 55 | 0.0375 | 66 | 0.0484 |
| 24+40 | 56 | 0.0382 | 58 | 0.0425 |
| 24+41 | 68 | 0.0464 | 85 | 0.0623 |
| 24+44 | 61 | 0.0416 | 63 | 0.0462 |
| 25+26 | 92 | 0.0628 | 65 | 0.0476 |
| 25+27 | 55 | 0.0375 | 47 | 0.0344 |
| 25+28 | 55 | 0.0375 | 47 | 0.0344 |
| 25+29 | 59 | 0.0402 | 48 | 0.0352 |
| 25+30 | 87 | 0.0593 | 60 | 0.0440 |
| 25+31 | 58 | 0.0396 | 54 | 0.0396 |
| 25+32 | 55 | 0.0375 | 47 | 0.0344 |
| 25+33 | 69 | 0.0471 | 62 | 0.0454 |
| 25+34 | 55 | 0.0375 | 47 | 0.0344 |
| 25+36 | 55 | 0.0375 | 47 | 0.0344 |
| 25+37 | 59 | 0.0402 | 54 | 0.0396 |
| 25+38 | 55 | 0.0375 | 47 | 0.0344 |
| 25+39 | 29 | 0.0198 | 49 | 0.0359 |
| 25+40 | 49 | 0.0334 | 49 | 0.0359 |
| 25+41 | 63 | 0.0430 | 67 | 0.0491 |
| 25+44 | 31 | 0.0211 | 28 | 0.0205 |
| 26+27 | 35 | 0.0239 | 32 | 0.0234 |
| 26+28 | 37 | 0.0252 | 33 | 0.0242 |
| 26+29 | 32 | 0.0218 | 30 | 0.0220 |
| 26+30 | 91 | 0.0621 | 67 | 0.0491 |
| 26+31 | 28 | 0.0191 | 28 | 0.0205 |
| 26+32 | 46 | 0.0314 | 32 | 0.0234 |
| 26+33 | 76 | 0.0518 | 62 | 0.0454 |
| 26+34 | 69 | 0.0471 | 50 | 0.0366 |
| 26+36 | 31 | 0.0211 | 27 | 0.0198 |
| 26+37 | 34 | 0.0232 | 23 | 0.0168 |
| 26+38 | 39 | 0.0266 | 32 | 0.0234 |
| 26+39 | 18 | 0.0123 | 22 | 0.0161 |
| 26+40 | 26 | 0.0177 | 18 | 0.0132 |
| 26+41 | 28 | 0.0191 | 49 | 0.0359 |
| 26+44 | 56 | 0.0382 | 48 | 0.0352 |
| 27+28 | 13 | 0.0089 | 13 | 0.0095 |

|       |    |        |    |        |
|-------|----|--------|----|--------|
| 27+29 | 8  | 0.0055 | 9  | 0.0066 |
| 27+30 | 78 | 0.0532 | 66 | 0.0484 |
| 27+31 | 8  | 0.0055 | 8  | 0.0059 |
| 27+32 | 18 | 0.0123 | 14 | 0.0103 |
| 27+33 | 87 | 0.0593 | 73 | 0.0535 |
| 27+34 | 32 | 0.0218 | 31 | 0.0227 |
| 27+36 | 8  | 0.0055 | 7  | 0.0051 |
| 27+37 | 34 | 0.0232 | 26 | 0.0190 |
| 27+38 | 14 | 0.0095 | 11 | 0.0081 |
| 27+39 | 60 | 0.0409 | 72 | 0.0527 |
| 27+40 | 8  | 0.0055 | 7  | 0.0051 |
| 27+41 | 10 | 0.0068 | 12 | 0.0088 |
| 27+44 | 22 | 0.0150 | 21 | 0.0154 |
| 28+29 | 9  | 0.0061 | 12 | 0.0088 |
| 28+30 | 84 | 0.0573 | 62 | 0.0454 |
| 28+31 | 0  | 0.0000 | 3  | 0.0022 |
| 28+32 | 18 | 0.0123 | 0  | 0.0000 |
| 28+33 | 78 | 0.0532 | 69 | 0.0505 |
| 28+34 | 49 | 0.0334 | 48 | 0.0352 |
| 28+36 | 9  | 0.0061 | 10 | 0.0073 |
| 28+37 | 31 | 0.0211 | 25 | 0.0183 |
| 28+38 | 10 | 0.0068 | 10 | 0.0073 |
| 28+39 | 61 | 0.0416 | 12 | 0.0088 |
| 28+40 | 11 | 0.0075 | 7  | 0.0051 |
| 28+41 | 18 | 0.0123 | 12 | 0.0088 |
| 28+44 | 25 | 0.0171 | 21 | 0.0154 |
| 29+30 | 89 | 0.0607 | 64 | 0.0469 |
| 29+31 | 5  | 0.0034 | 8  | 0.0059 |
| 29+32 | 14 | 0.0095 | 11 | 0.0081 |
| 29+33 | 82 | 0.0559 | 70 | 0.0513 |
| 29+34 | 29 | 0.0198 | 30 | 0.0220 |
| 29+36 | 5  | 0.0034 | 7  | 0.0051 |
| 29+37 | 27 | 0.0184 | 22 | 0.0161 |
| 29+38 | 11 | 0.0075 | 11 | 0.0081 |
| 29+39 | 60 | 0.0409 | 74 | 0.0542 |
| 29+40 | 8  | 0.0055 | 7  | 0.0051 |
| 29+41 | 10 | 0.0068 | 15 | 0.0110 |
| 29+44 | 19 | 0.0130 | 22 | 0.0161 |
| 30+31 | 74 | 0.0505 | 57 | 0.0418 |
| 30+32 | 81 | 0.0553 | 57 | 0.0418 |
| 30+33 | 72 | 0.0491 | 57 | 0.0418 |
| 30+34 | 84 | 0.0573 | 62 | 0.0454 |
| 30+36 | 84 | 0.0573 | 62 | 0.0454 |
| 30+37 | 90 | 0.0614 | 60 | 0.0440 |

|       |    |        |    |        |
|-------|----|--------|----|--------|
| 30+38 | 85 | 0.0580 | 62 | 0.0454 |
| 30+39 | 16 | 0.0109 | 19 | 0.0139 |
| 30+40 | 69 | 0.0471 | 54 | 0.0396 |
| 30+41 | 81 | 0.0553 | 59 | 0.0432 |
| 30+44 | 39 | 0.0266 | 35 | 0.0256 |
| 31+32 | 3  | 0.0020 | 3  | 0.0022 |
| 31+33 | 79 | 0.0539 | 76 | 0.0557 |
| 31+34 | 33 | 0.0225 | 41 | 0.0300 |
| 31+36 | 5  | 0.0034 | 6  | 0.0044 |
| 31+37 | 29 | 0.0198 | 19 | 0.0139 |
| 31+38 | 7  | 0.0048 | 8  | 0.0059 |
| 31+39 | 60 | 0.0409 | 74 | 0.0542 |
| 31+40 | 10 | 0.0068 | 18 | 0.0132 |
| 31+41 | 11 | 0.0075 | 13 | 0.0095 |
| 31+44 | 11 | 0.0075 | 8  | 0.0059 |
| 32+33 | 78 | 0.0532 | 69 | 0.0505 |
| 32+34 | 61 | 0.0416 | 62 | 0.0454 |
| 32+36 | 14 | 0.0095 | 10 | 0.0073 |
| 32+37 | 41 | 0.0280 | 35 | 0.0256 |
| 32+38 | 16 | 0.0109 | 11 | 0.0081 |
| 32+39 | 55 | 0.0375 | 68 | 0.0498 |
| 32+40 | 24 | 0.0164 | 25 | 0.0183 |
| 32+41 | 24 | 0.0164 | 23 | 0.0168 |
| 32+44 | 38 | 0.0259 | 33 | 0.0242 |
| 33+34 | 78 | 0.0532 | 69 | 0.0505 |
| 33+36 | 80 | 0.0546 | 69 | 0.0505 |
| 33+37 | 77 | 0.0525 | 72 | 0.0527 |
| 33+38 | 80 | 0.0546 | 69 | 0.0505 |
| 33+39 | 57 | 0.0389 | 69 | 0.0505 |
| 33+40 | 79 | 0.0539 | 70 | 0.0513 |
| 33+41 | 75 | 0.0512 | 82 | 0.0601 |
| 33+44 | 51 | 0.0348 | 49 | 0.0359 |
| 34+36 | 28 | 0.0191 | 28 | 0.0205 |
| 34+37 | 44 | 0.0300 | 46 | 0.0337 |
| 34+38 | 19 | 0.0130 | 22 | 0.0161 |
| 34+39 | 60 | 0.0409 | 74 | 0.0542 |
| 34+40 | 33 | 0.0225 | 44 | 0.0322 |
| 34+41 | 35 | 0.0239 | 50 | 0.0366 |
| 34+44 | 56 | 0.0382 | 59 | 0.0432 |
| 36+37 | 27 | 0.0184 | 22 | 0.0161 |
| 36+38 | 11 | 0.0075 | 9  | 0.0066 |
| 36+39 | 60 | 0.0409 | 72 | 0.0527 |
| 36+40 | 8  | 0.0055 | 7  | 0.0051 |
| 36+41 | 10 | 0.0068 | 12 | 0.0088 |

|       |    |        |    |        |
|-------|----|--------|----|--------|
| 36+44 | 17 | 0.0116 | 20 | 0.0147 |
| 37+38 | 26 | 0.0177 | 20 | 0.0147 |
| 37+39 | 40 | 0.0273 | 30 | 0.0220 |
| 37+40 | 41 | 0.0280 | 39 | 0.0286 |
| 37+41 | 22 | 0.0150 | 17 | 0.0125 |
| 37+44 | 49 | 0.0334 | 20 | 0.0147 |
| 38+39 | 62 | 0.0423 | 75 | 0.0549 |
| 38+40 | 14 | 0.0095 | 12 | 0.0088 |
| 38+41 | 16 | 0.0109 | 26 | 0.0190 |
| 38+44 | 23 | 0.0157 | 14 | 0.0103 |
| 39+40 | 54 | 0.0368 | 69 | 0.0505 |
| 39+41 | 38 | 0.0259 | 60 | 0.0440 |
| 39+44 | 60 | 0.0409 | 74 | 0.0542 |
| 40+41 | 17 | 0.0116 | 16 | 0.0117 |
| 40+44 | 32 | 0.0218 | 31 | 0.0227 |
| 41+44 | 37 | 0.0252 | 29 | 0.0212 |

---

Notes: Please refer to Table S1 for the specific names of the enzymes corresponding to each number.

**Table S5.** Box-Behnken design and experimental results of response surface methodology.

| Run | X <sub>1</sub> (substrate concentration/%) | X <sub>2</sub> (enzyme-substrate ratio/‰) | X <sub>3</sub> (time/h) | Y (umami score) | Calculated umami score | Relative error (%) |
|-----|--------------------------------------------|-------------------------------------------|-------------------------|-----------------|------------------------|--------------------|
| 1   | 7                                          | 3                                         | 2                       | 6.22            | 6.27                   | 0.80               |
| 2   | 9                                          | 3                                         | 1                       | 5.82            | 5.85                   | 0.60               |
| 3   | 7                                          | 2                                         | 3                       | 5.68            | 5.69                   | 0.26               |
| 4   | 7                                          | 3                                         | 2                       | 6.23            | 6.27                   | 0.64               |
| 5   | 9                                          | 3                                         | 3                       | 5.53            | 5.51                   | 0.27               |
| 6   | 7                                          | 3                                         | 2                       | 6.25            | 6.27                   | 0.32               |
| 7   | 7                                          | 2                                         | 1                       | 5.46            | 5.42                   | 0.64               |
| 8   | 5                                          | 3                                         | 1                       | 5.34            | 5.35                   | 0.28               |
| 9   | 7                                          | 3                                         | 2                       | 6.26            | 6.27                   | 0.16               |
| 10  | 7                                          | 4                                         | 3                       | 5.54            | 5.57                   | 0.63               |
| 11  | 9                                          | 4                                         | 2                       | 5.98            | 5.96                   | 0.33               |
| 12  | 5                                          | 3                                         | 3                       | 5.68            | 5.64                   | 0.62               |
| 13  | 5                                          | 2                                         | 2                       | 5.58            | 5.60                   | 0.36               |
| 14  | 5                                          | 4                                         | 2                       | 5.69            | 5.69                   | <0.01              |
| 15  | 9                                          | 2                                         | 2                       | 5.70            | 5.70                   | <0.01              |
| 16  | 7                                          | 3                                         | 2                       | 6.39            | 6.27                   | 1.88               |
| 17  | 7                                          | 4                                         | 1                       | 5.91            | 5.89                   | 0.25               |

**Table S6.** ANOVA for response surface quadratic model: estimated regression model of the relationship between dependent variables and independent variables.

| Source                                  | Sum of squares | df | Mean square | F-Value | P-Value | Significant |
|-----------------------------------------|----------------|----|-------------|---------|---------|-------------|
| Model                                   | 1.68           | 9  | 0.1871      | 51.17   | <0.0001 | **          |
| X <sub>1</sub> -substrate concentration | 0.0685         | 1  | 0.0685      | 18.72   | 0.0035  | **          |
| X <sub>2</sub> -enzyme addition         | 0.0613         | 1  | 0.0613      | 16.75   | 0.0046  | **          |
| X <sub>3</sub> -time                    | 0.0012         | 1  | 0.0012      | 0.3418  | 0.5771  |             |
| X <sub>1</sub> X <sub>2</sub>           | 0.0072         | 1  | 0.0072      | 1.98    | 0.2027  |             |
| X <sub>1</sub> X <sub>3</sub>           | 0.0992         | 1  | 0.0992      | 27.13   | 0.0012  | **          |
| X <sub>2</sub> X <sub>3</sub>           | 0.0870         | 1  | 0.0870      | 23.80   | 0.0018  | **          |
| X <sub>1</sub> <sup>2</sup>             | 0.3633         | 1  | 0.3633      | 99.35   | <0.0001 | **          |
| X <sub>2</sub> <sup>2</sup>             | 0.2400         | 1  | 0.2400      | 65.63   | <0.0001 | **          |
| X <sub>3</sub> <sup>2</sup>             | 0.6201         | 1  | 0.6201      | 169.55  | <0.0001 | **          |
| Residual                                | 0.0256         | 7  | 0.0037      |         |         |             |
| Lack of Fit                             | 0.0066         | 3  | 0.0022      | 0.4632  | 0.7234  |             |
| Pure Error                              | 0.0190         | 4  | 0.0047      |         |         |             |
| Cor Total                               | 1.71           | 16 |             |         |         |             |
